# Supplementary material for: Coumarins from Jinhua Finger Citron: Separation by Liquid–Liquid Chromatography and Potential Antitumor Activity
Source: MDPI journal article supplement (doi:10.3390/molecules28196917), 2023-10-03

## Supporting Information

# Coumarins from Jinhua Finger Citron: Separation by Liquid–Liquid Chromatography and Potential Antitumor Activity

Chaoyue Wang <sup>1,2,†</sup>, Jiangang Huang <sup>2,†</sup>, Zhiling Zhou <sup>1</sup>, Ping Xu <sup>3</sup>, Jingyi Shi <sup>1</sup>,  
Yushun Yang <sup>1</sup>, Shengqiang Tong <sup>3,\*</sup> and Hongyu Hu <sup>2,\*</sup>

<sup>1</sup> Jinhua Advanced Research Institute, Jinhua 321015, China

<sup>2</sup> Xingzhi College, Zhejiang Normal University, Lanxi 321100, China

<sup>3</sup> College of Pharmaceutical Science, Zhejiang University of Technology, Hangzhou 310014, China

\* Correspondence: sqtong@zjut.edu.cn (S.T.); huhongyu22@126.com (H.H.)

† These authors contributed equally to this work.

### Supplementary Figures

Representative NMR spectra:

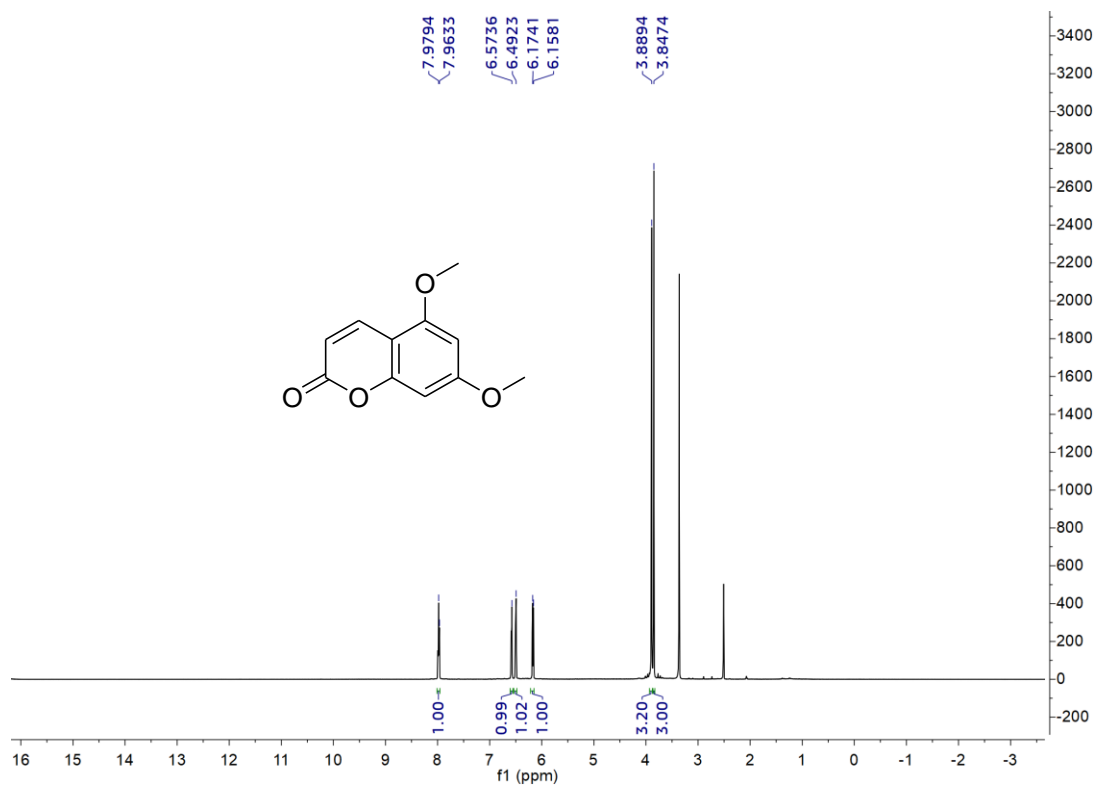

Figure S1. The <sup>1</sup>H NMR spectrum of compound I.

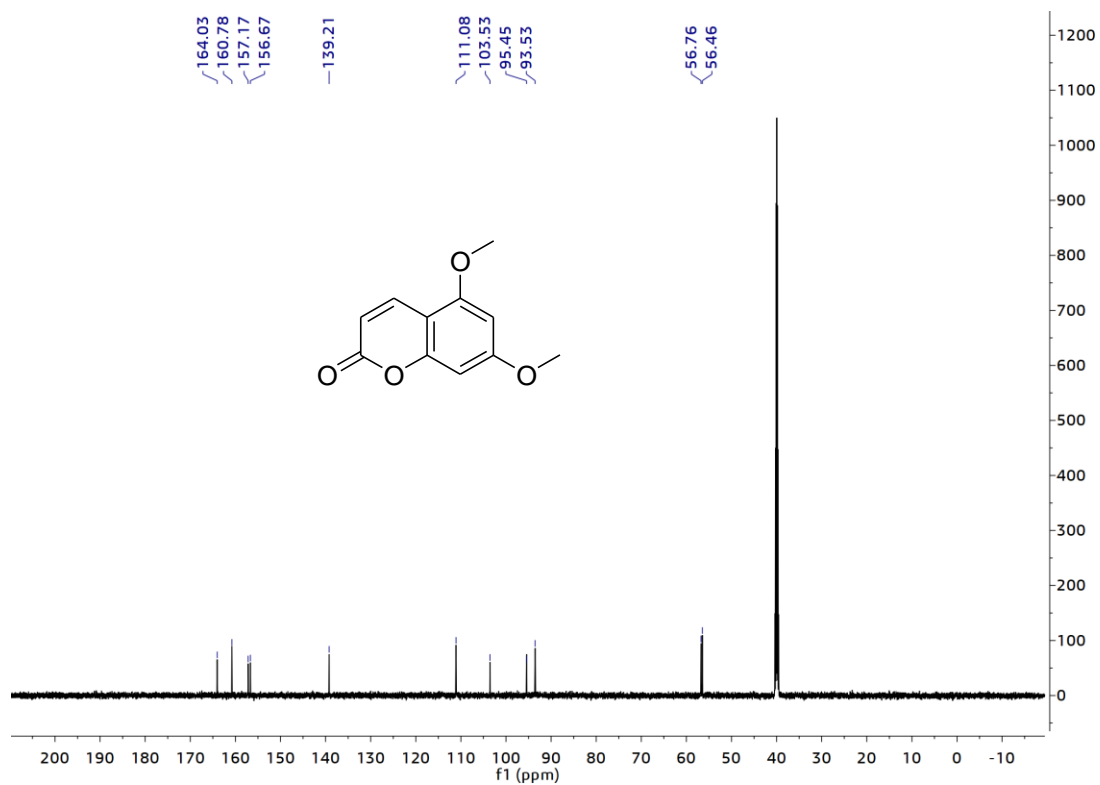

Figure S2. The <sup>13</sup>C NMR spectrum of compound I.

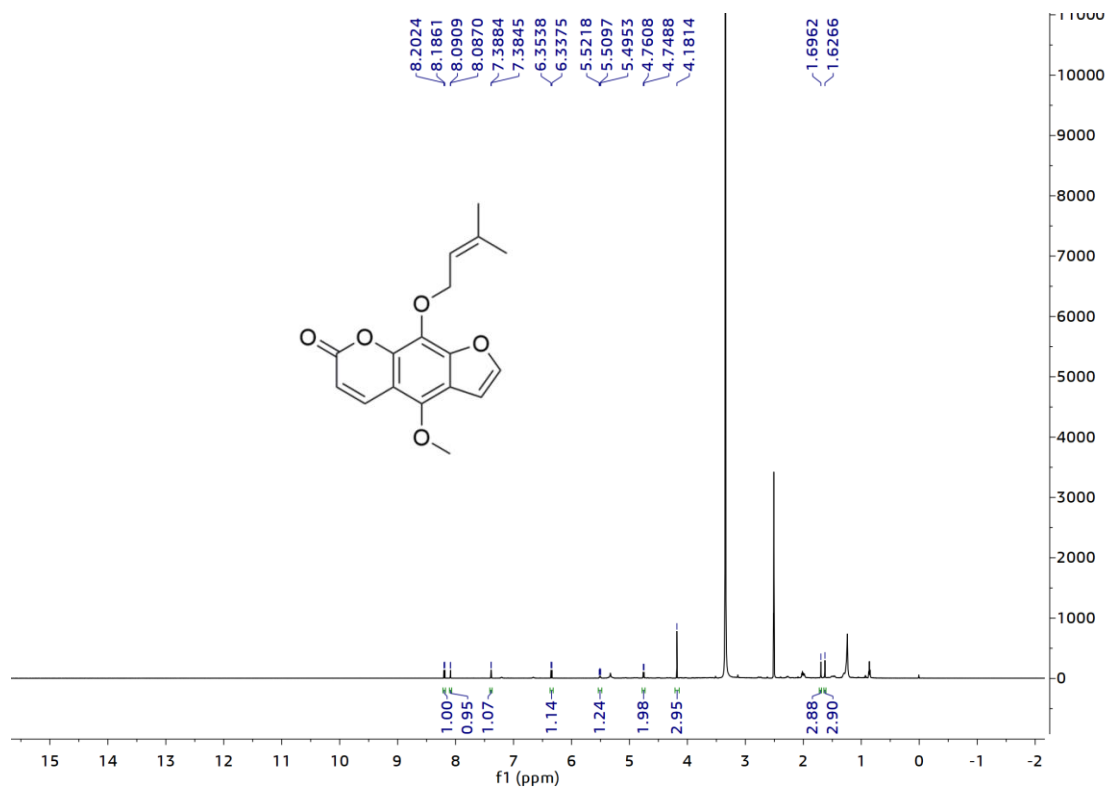

Figure S3. The <sup>1</sup>H NMR spectrum of compound II.

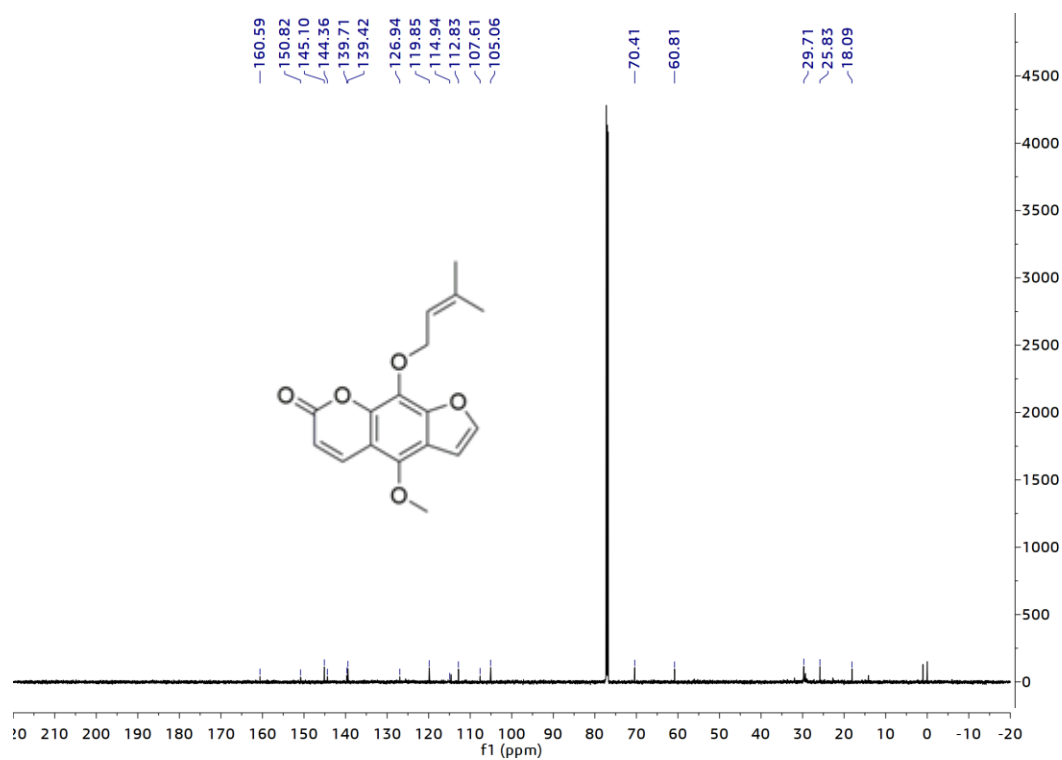

Figure S4. The <sup>13</sup>C NMR spectrum of compound II.

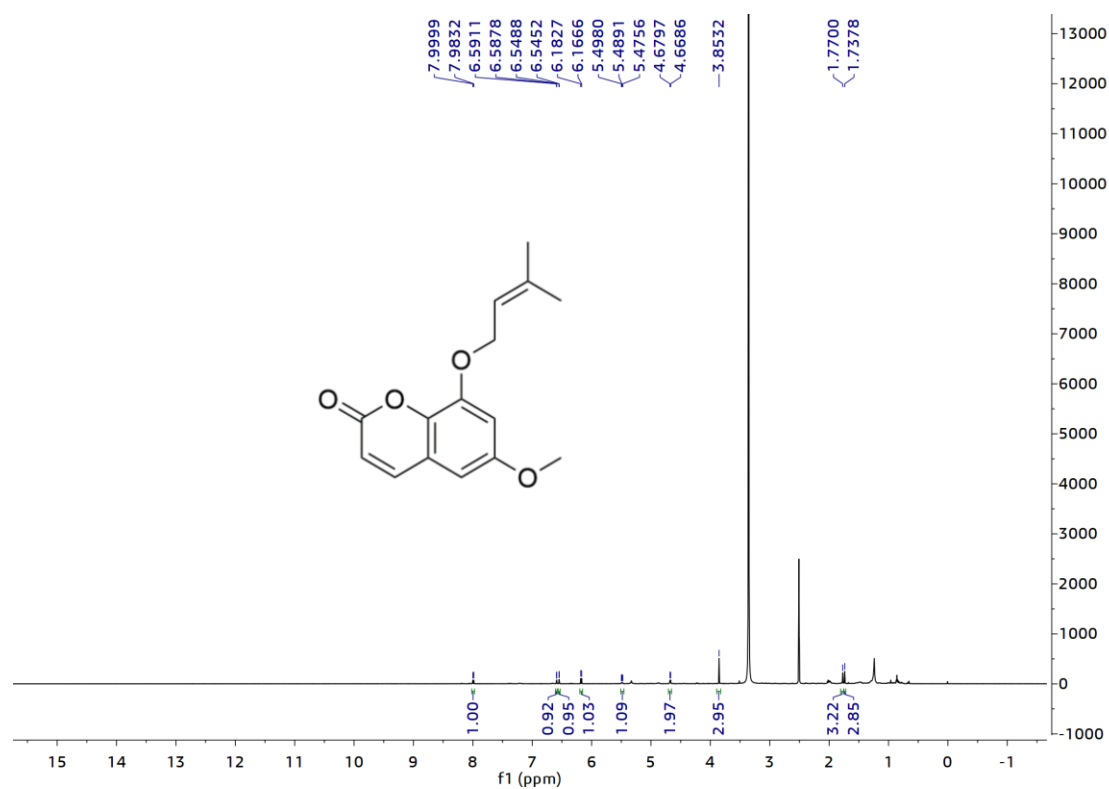

Figure S5. The <sup>1</sup>H NMR spectrum of compound III.

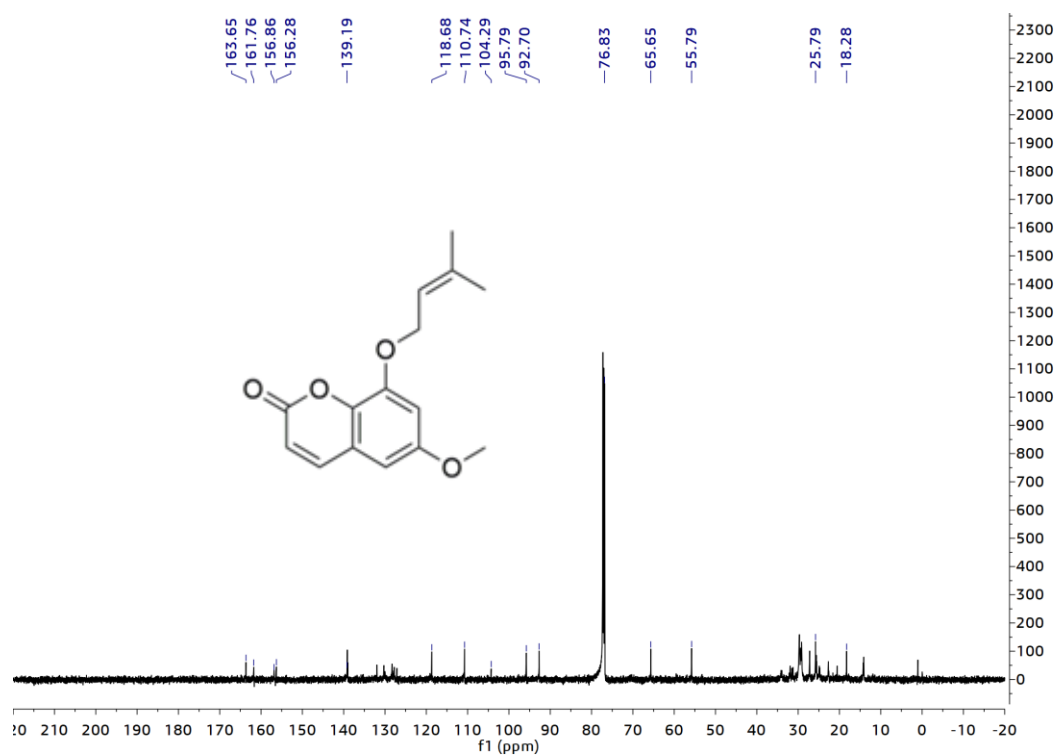

Figure S6. The <sup>13</sup>C NMR spectrum of compound III.

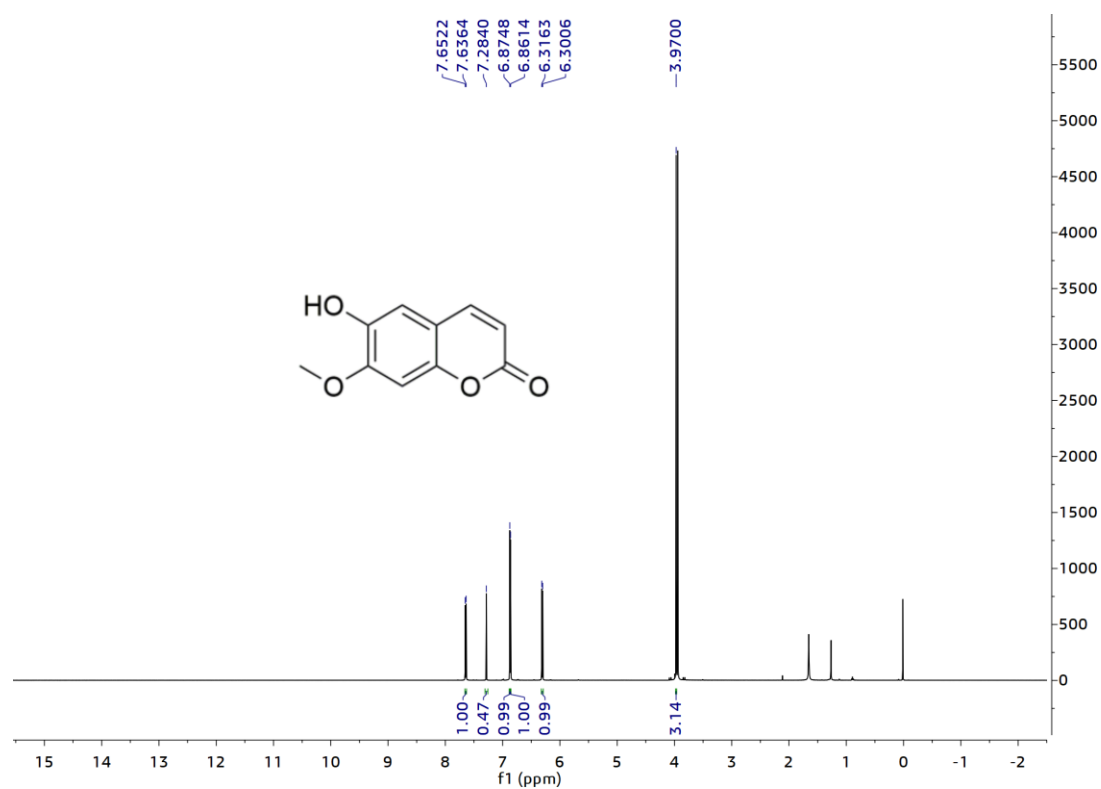

Figure S7. The <sup>1</sup>H NMR spectrum of compound IV.

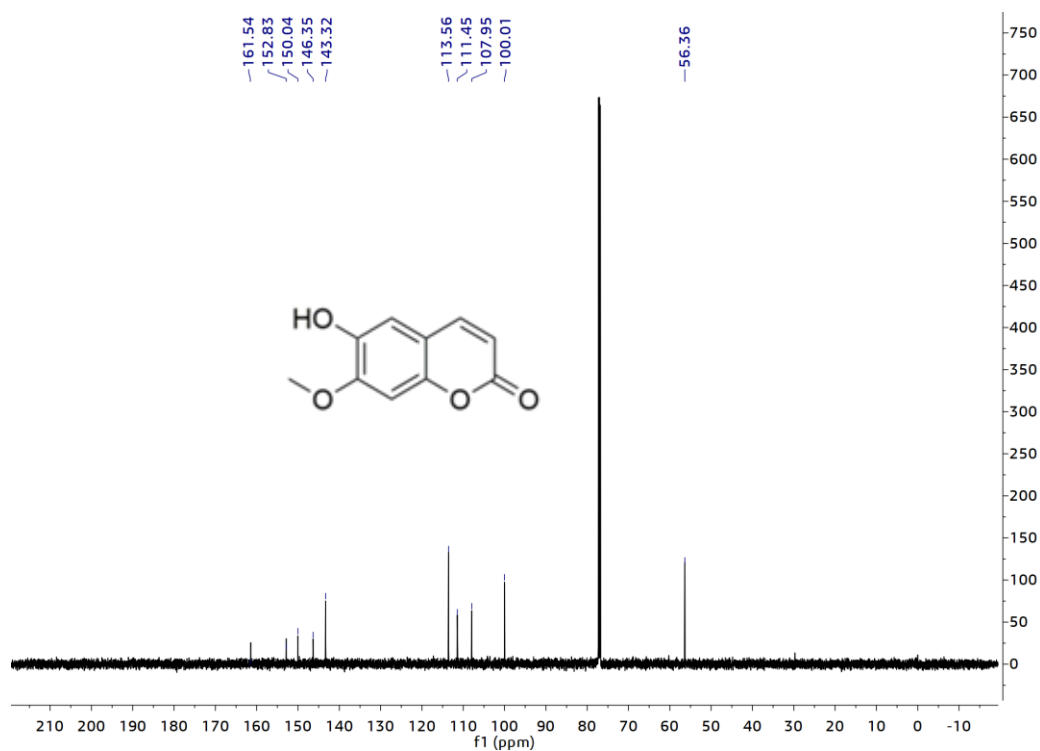

Figure S8. The <sup>13</sup>C NMR spectrum of compound IV.

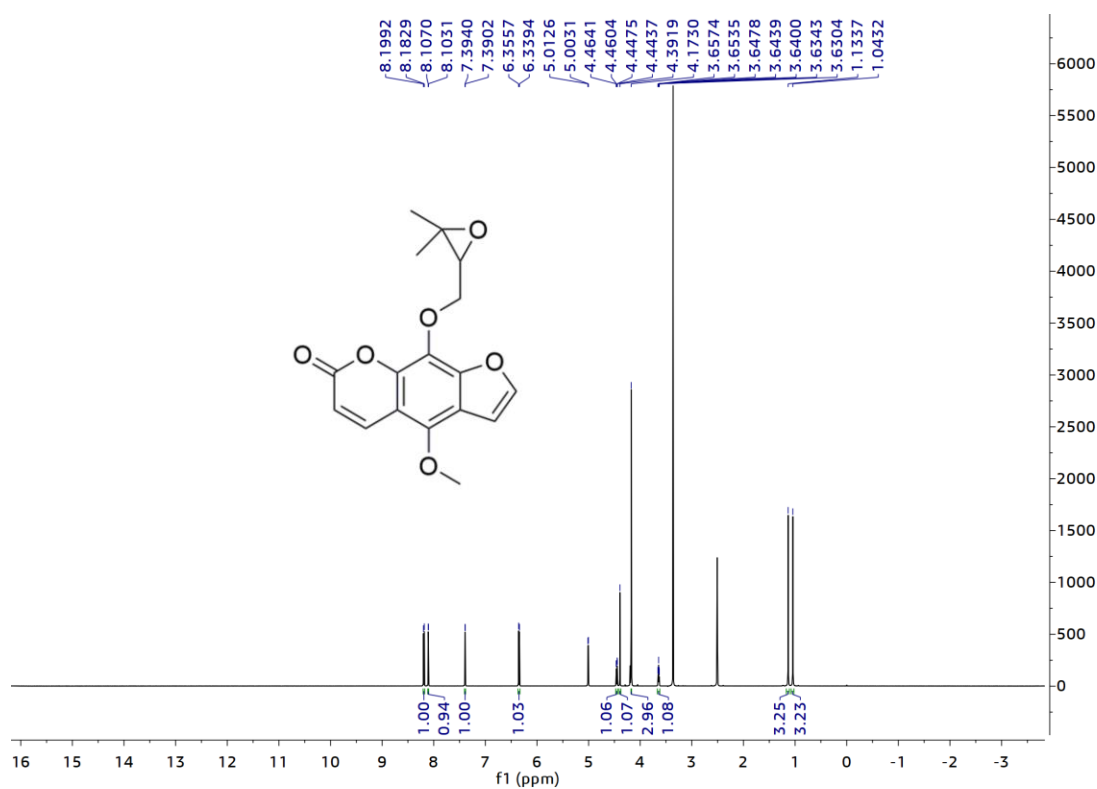

Figure S9. The <sup>1</sup>H NMR spectrum of compound V.

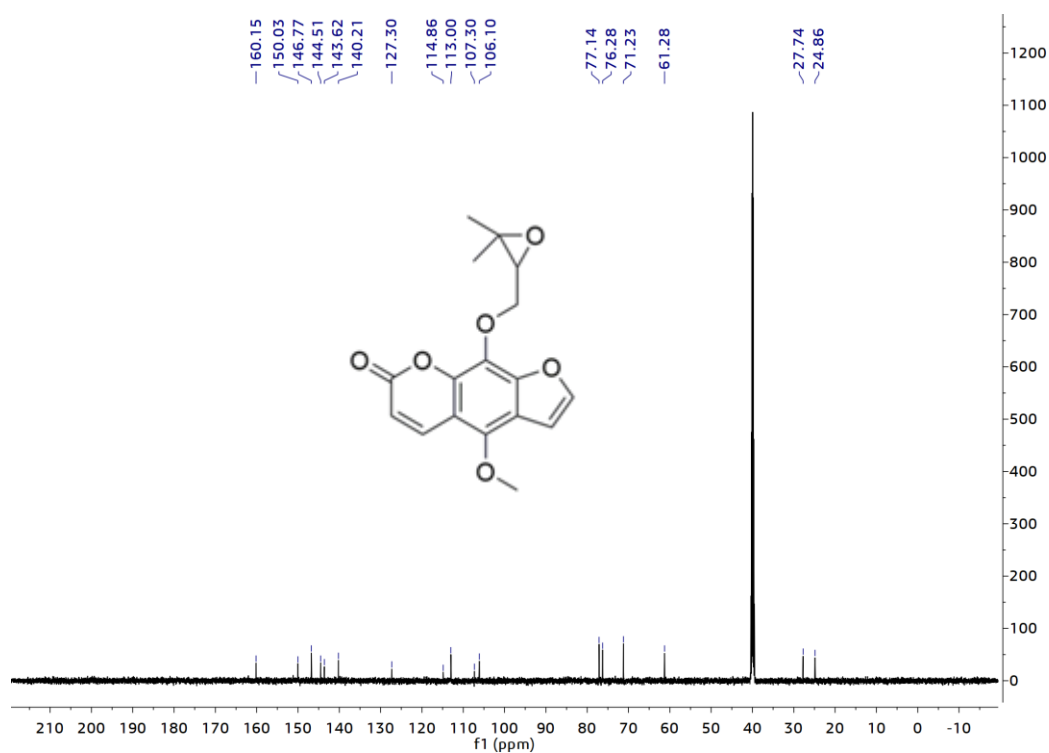

Figure S10. The  $^{13}\text{C}$  NMR spectrum of compound V.

Original Western Blotting images:

PARP

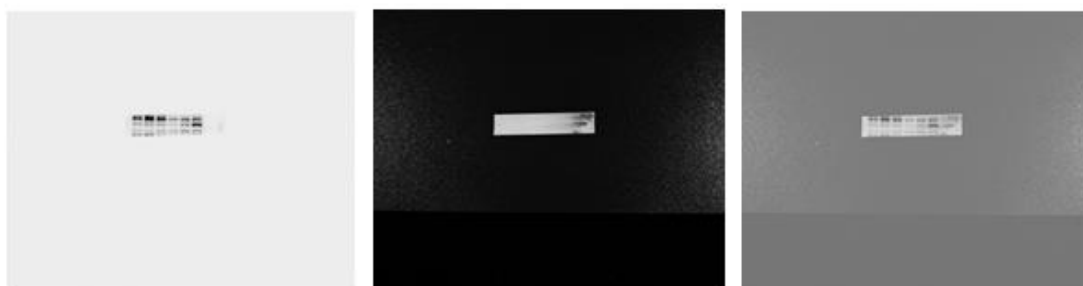

Bcl-2

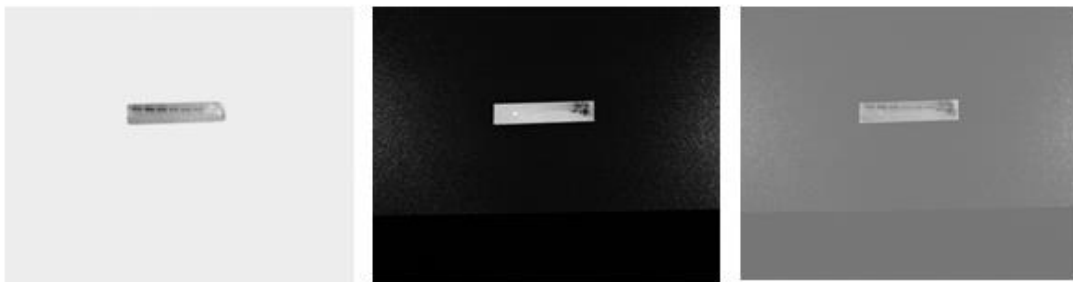

GAPDH

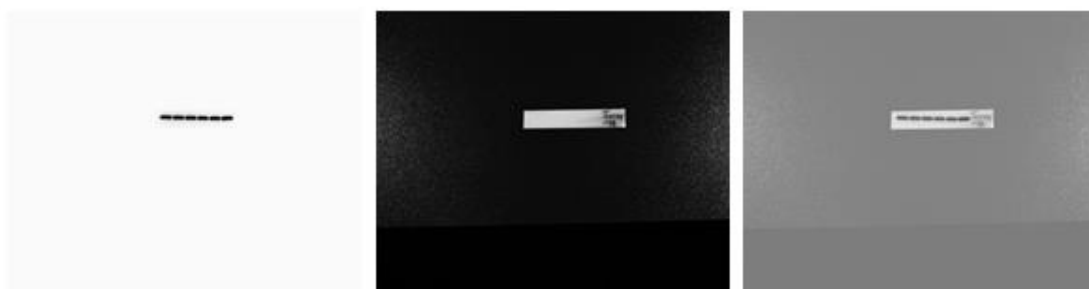

Supplement: s1 [file s1]
